# Supplementary material
Source: publisher figshare collection journal article supplement (https://gsapubs.figshare.com/ndownloader/files/22409322)
Supplement: Supplementary file 1 [file 22409322]

## Sheet: DR-2 XRF majors
Putnam, R., Glazner, A.F., Coleman, D.S., Kylander-Clark, A.R.C., Pavelsky, T., and Abbot, M.I., 2015, Plutonism in three dimensions: Field and geochemical relations on the southeast face of El Capitan, Yosemite National Park, California: Geosphere, v. 11, doi:10.1130/GES01133.1.
SUPPLEMENTAL TABLE 1. MAJOR ELEMENT DATA DETERMINED BY XRF
Sample number	Rock type	Relative elevation (m)*	SiO2 (wt%)	TiO2 (wt%)	Al2O3 (wt%)	Fe2O3T (wt%)	MnO (wt%)	MgO (wt%)	CaO (wt%)	Na2O (wt%)	K2O (wt%)	P2O5 (wt%)	Sum	Loss on ignition	Location description†
BRO-02	Kap	NA	77.15	0.079	12.79	0.97	0.014	0.14	1.08	2.78	5.67	0.07	100.743	N.D.	10 m right of Rixon's Pinnacle Right
EB-01	Kap	354	76.669	0.05	12.832	0.519	0.021	0.011	0.411	2.672	6.802	0	99.961	0.342873	The East Buttress, belay 4
ECT-01	Kt	272	75.941	0.092	13.059	1.232	0.043	0.135	1.08	2.955	5.35	0.02	99.907	0.225966	El Capitan Tree, belay 3
ECT-02	Kap	315	76.432	0.074	13.543	0.789	0.016	0.21	1.311	3.661	4.295	0	100.322	0.226816	El Capitan Tree, belay 5
ECT-04	Kec	308	75.074	0.293	13.688	2.51	0.047	0.707	3.286	3.831	1.006	0.044	100.486	0.377191	El Capitan Tree, belay 7
ECT-06	Kap	292	77.041	0.032	13.23	0.58	0.019	0.035	0.881	3.856	4.584	0	100.247	0.176467	El Capitan Tree, 20 m down the first rappell
ECT-07	Kec	230	75.745	0.085	13.389	1.023	0.032	0.087	1.099	3.51	4.711	0	99.661	0.0442796	El Capitan Tree, 40 m down the secoN.D. rappel
FS-01	Kap	224	74.771	0.034	14.459	0.72	0.017	0.033	0.907	3.607	5.962	0	100.112	0.440566	The Footstool, left side of summit
FS-02	Kt	222	75.397	0.087	13.62	0.918	0.027	0.076	0.933	3.079	5.764	0	100.057	0.333603	The Footstool, 4 m below right side of summit
FT-01	Kap	NA	74.91	0.041	12.78	1.02	0.017	0.04	0.74	3.36	5	0	97.908	N.D.	271045, 4181409
HLR-01	Kec	239	72.163	0.258	14.928	2.142	0.048	0.495	1.917	3.556	4.581	0.024	100.42	0.368209	Heart Ledges rappel line, 1st station
HLR-02	Kec	163	74.637	0.218	13.679	1.994	0.046	0.444	1.81	3.474	3.722	0.033	100.341	0.334087	Heart Ledges rappel line, 3rd station
LC-01	Klt	NA	70.612	0.406	14.945	3.2	0.063	1.106	3.068	3.435	3.528	0.057	99.554	0.534516	Lower Cathedral Rock, float 10 m below Jungle Boogie
LC-02	Kbv	NA	69.362	0.48	15.961	3.344	0.055	0.972	3.433	3.705	2.92	0.109	100.106	0.404349	Lower Cathedral Rock, float 10 m below Jungle Boogie
LC-05	Klt	NA	69.181	0.412	15.389	3.273	0.064	1.022	3.021	3.252	3.882	0.058	99.373	0.265335	Lower Cathedral Rock, Overhang Bypass start
LC-06	Klt	Na	69.433	0.443	15.074	3.806	0.08	1.173	3.106	3.413	3.516	0.062	100.431	0.379258	Lower Cathedral Rock, 10 m right of EN.D. of the Line
LJ-01	Kec	94	71.674	0.212	14.907	1.99	0.063	0.449	1.891	3.79	4.375	0.022	100.434	0.52199	Left side of the summit of Little John
ME-02	Kt	813	76.253	0.152	13.417	1.455	0.027	0.237	1.312	3.172	4.382	0.024	99.911	0.245907	Mescalito, belay 26
MW-01	Kec	360	71.995	0.301	15.137	2.422	0.045	0.649	2.254	3.581	4.003	0.047	100.406	0.500864	Muir Wall, belay 12
MW-02	Kec	451	74.812	0.237	13.417	1.997	0.039	0.472	1.92	3.243	3.752	0.022	100.642	0.533038	Muir Wall, belay 15
MW-03	Ktn	457	67.178	0.602	16.651	4.372	0.085	1.084	3.47	4.263	2.572	0.129	99.916	0.276977	Muir Wall, belay 15
MW-04	Ktn	529	66.033	0.588	17.376	4.477	0.123	1.369	4.022	4.573	1.945	0.136	100.582	0.579581	Muir Wall, belay 18
MW-05	Kec	546	72.656	0.273	14.371	2.459	0.037	0.647	2.346	3.517	3.568	0.042	100.228	0.291397	Muir Wall, belay 19
MW-06	Ktn	589	61.248	0.782	19.336	5.302	0.062	1.814	5.8	4.125	1.899	0.214	99.727	0.330131	Muir Wall, belay 21
MW-07	Kec	628	73.852	0.181	14.364	1.702	0.042	0.414	2.028	3.695	3.928	0.022	100.455	0.298448	Muir Wall, belay 22
MW-08	Kt	654	74.236	0.18	13.95	1.7	0.022	0.275	1.772	3.424	4.164	0.004	100.39	0.493508	Muir Wall, belay 23
MW-09	Kt	688	76.405	0.137	13.1	1.679	0.031	0.191	1.345	3.297	4.269	0.001	99.752	0.347222	Muir Wall, belay 24
MW-10	Kt	727	76.781	0.124	12.943	1.358	0.031	0.184	1.248	3.137	4.593	0	99.144	0.244525	Muir Wall, belay 27
MW-11	Kt	760	74.128	0.145	14.144	1.452	0.045	0.218	1.392	3.423	4.799	0.006	100.209	0.407237	Quo Vadis, belay 20
MW-12	Kt	800	75.151	0.127	13.196	1.394	0.032	0.161	1.155	3.196	4.738	0	100.086	0.306886	Quo Vadis, belay 21
MW-13	Kt	823	70.161	0.415	15.76	3.292	0.108	0.847	2.826	4.316	2.39	0.094	100.56	0.261003	Muir Wall, belay 32
NAW-01	Kec	307	74.663	0.183	13.842	1.742	0.041	0.421	1.936	3.632	3.6	0.026	99.986	0.25415	North America Wall, belay 4
NAW-02	Kec	333	71.945	0.27	14.997	2.455	0.065	0.659	2.025	3.65	4.451	0.043	99.879	0.441691	North America Wall, belay 5
NAW-03	Kec	366	73.882	0.302	13.513	2.657	0.05	0.714	2.24	3.32	3.265	0.043	100.059	0.311456	North America Wall, belay 6
NAW-04	Kec	415	70.777	0.28	15.383	2.5	0.041	0.653	2.498	3.463	4.237	0.047	100.145	0.31489	North America Wall, belay 8
NED-01	Kec	126	74.636	0.214	13.566	1.886	0.043	0.417	1.749	3.309	4.215	0.024	99.846	0.223126	New Dawn, belay 1
NED-02	Kec	244	76.059	0.243	12.059	2.19	0.062	0.499	0.737	2.126	6.144	0.026	100.058	0.410167	New Dawn, belay 4
NED-03	Kec	322	71.399	0.248	15.21	2.224	0.047	0.542	2.047	3.774	4.321	0.034	99.062	0.186268	New Dawn, belay 7
NED-04	Kec	358	75.416	0.267	12.66	2.363	0.067	0.585	1.627	3.151	3.891	0.031	100.455	0.34178	New Dawn, belay 8
NED-05	Kec	455	72.088	0.229	14.376	2.14	0.059	0.484	1.839	3.705	4.116	0.026	100.061	0.531158	New Dawn, belay 11
NED-06	Kec	520	73.791	0.232	14.141	2.112	0.059	0.501	1.768	3.561	4.267	0.023	100.512	0.221835	New Dawn, 30 m above belay 15
NED-07	Kec	595	72.594	0.233	14.785	1.991	0.054	0.482	2.063	3.8	4.027	0.032	99.83	0.357989	New Dawn, belay 17
NED-08	Kec	657	74.261	0.248	13.781	2.268	0.068	0.567	1.99	3.701	3.594	0.034	100.289	0.319818	New Dawn, belay 19
NED-09	Kt	718	75.989	0.137	13.01	1.458	0.068	0.195	1.389	3.296	4.333	0	92.745	0.402312	New Dawn, belay 22
NED-10	Kt	793	76.4	0.135	13.224	1.301	0.03	0.188	1.479	3.287	4.253	0	99.91	0.126683	New Dawn, belay 25
NED-12	Kt	852	70.466	0.112	12.319	1.289	0.029	0.167	1.051	2.959	4.338	0.015	99.819	0.29639	New Dawn, belay 28
NO-01	Kt	665	74.966	0.147	13.708	1.58	0.04	0.238	1.375	3.489	4.368	0	99.216	0.345026	"The Nose", belay 24
NO-02	Kt	689	75.39	0.153	13.371	1.527	0.038	0.262	1.405	3.29	4.376	0.007	100.289	0.281191	The Nose, belay 25
NO-03	Kt	724	76.046	0.12	12.994	1.197	0.028	0.163	1.411	3.131	4.139	0	99.845	0.256551	The Nose, belay 26
NO-04	Kt	791	76.379	0.128	13.119	1.445	0.034	0.199	1.267	3.307	4.41	0.001	100.134	0.529001	The Nose, 10 m below belay 28
NO-05	Kt	812	72.517	0.28	14.624	2.556	0.065	0.553	2.191	4.233	2.778	0.048	99.726	0.213183	The Nose, belay 29
NO-06	Kt	847	75.729	0.116	13.489	1.298	0.031	0.162	1.108	3.033	5.176	0	99.976	0.497141	The Nose, belay 31
NO-07	Kec	175	73.777	0.191	13.931	1.885	0.049	0.421	1.767	3.488	4.199	0.018	99.888	0.179923	The Nose, belay 4
NS-01	Klt	217	68.301	0.571	15.028	4.097	0.078	1.533	3.636	3.252	3.393	0.087	100.334	0.695742	Native Son, route start
PRO-01	Kt	572	75.829	0.067	13.264	0.948	0.029	0.089	0.996	2.814	5.873	0	100.175	0.636716	The Prophet, belay 14
PRO-02	Kt	523	76.78	0.107	12.855	1.338	0.022	0.129	1.326	2.728	5.06	0	100.494	0.240577	The Prophet, belay 9
PRO-03	Kt	479	77.973	0.113	12.007	1.431	0.041	0.13	1.08	2.707	4.704	0	100.016	0.29151	The Prophet, 1 m below belay 7
PRO-04	Kt	428	75.637	0.084	13.774	1.09	0.033	0.104	1.143	3.131	5.512	0	99.624	0.427666	The Prophet, 20 m above belay 5
PRO-06	Kap	335	76.18	0.023	13.502	0.451	0.018	0	0.676	3.339	5.853	0	100.07	0.453314	The Prophet, belay 3
PRO-07	Kt	301	75.582	0.125	13.135	1.374	0.032	0.182	1.332	3	4.87	0	99.629	0.437561	The Prophet, 25 m above belay 2
PRO-09	Klt	242	67.831	0.585	15.271	4.334	0.084	1.663	3.806	3.455	2.912	0.129	100.051	0.668743	The Prophet, route start
PRO-10	Kt	243	75.962	0.145	12.945	1.294	0.029	0.185	1.29	2.932	4.822	0.025	99.672	0.31869	The Prophet, 10 m right of the start of the route
SW-01	Kec	213	73.517	0.211	14.161	1.915	0.052	0.441	1.672	3.281	4.782	0.019	100.162	0.287866	Salathe Wall, belay 6
SW-02	Kec	285	74.196	0.186	13.795	1.874	0.045	0.448	1.913	3.501	3.695	0.019	100.478	0.254528	Salathe Wall, belay 8
SW-03	Kap	338	75.764	0.089	13.627	1.105	0.043	0.148	1.175	3.474	4.741	0	100.138	0.388594	Salathe Wall, belay 10
SW-04	Kec	334	74.628	0.201	13.99	1.728	0.046	0.385	1.714	3.42	4.35	0.016	100.196	0.345511	Salathe Wall, belay 10
SW-05	Kec	287	72.789	0.282	14.434	2.416	0.059	0.627	1.95	3.517	4.027	0.037	99.866	0.153682	Salathe Wall, belay 11
ZO-01	Kec	277	76.224	0.122	13.164	1.312	0.039	0.297	1.26	3.284	4.452	0.042	100.114	0.215265	Zodiac, belay 2
ZO-02	Kec	309	76.514	0.126	12.784	1.334	0.038	0.179	1.095	3.015	4.756	0.025	99.848	0.443514	Zodiac, belay 3
ZO-03	Kt	337	75.634	0.116	13.513	1.215	0.036	0.142	1.119	3.231	5.084	0.024	99.681	0.526284	Zodiac, belay 4
ZO-05	Kap	412	75.59	0.032	13.32	0.91	0.204	0.02	0.6	3.76	4.8	0	99.236	N.D.	Zodiac, belay 7
ZO-06	Klt	410	68.432	0.539	15.258	3.972	0.068	1.494	3.714	3.33	2.924	0.117	99.848	0.35	Zodiac, 10 m above belay 7
ZO-07	Kt	637	76.001	0.128	13.151	1.279	0.024	0.15	1.094	2.804	5.035	0.015	99.681	N.D.	Zodiac, belay 15
AGV-1§	mean		60.21	1.08	17.31	6.82	0.1	1.56	5.04	4.34	2.97	0.53	99.96	0.351735	Mean of all samples
	accepted		60.24	1.07	17.37	6.85	0.1	1.57	4.99	4.37	2.95	0.52	100
	s.d.		0.11	0.01	0.06	0.04	0	0.02	0.02	0.08	0.01	0.01
Note: Samples are stored in the collections of University of North Carolina, Chapel Hill Department of Geological Sciences, Chapel Hill, North Carolina 27599. Major element compositions are in weight percent. Major elements compositions express total Fe as Fe2O3 and have been normalized 100 wt% anhydrous.
*The elevation, in meters, above the lowest point of exposed rock on the southwest face of El Capitan, near the start of the Nose (Figure 4)
†Most samples were taken from >500m cliffs, rendering GPS innacurate. Therefore, locations are described relative to climbing routes (Reed, 1996; Putnam and Sloan, 2014) as observed facing the cliff. UTMs given in NAD 1983 Zone 11S.
§Results of 12 replicate analyses of USGS standard AGV-1.
